# Supplementary material for: National consensus statement by the Austrian Societies for Rheumatology, Pulmonology, Infectiology, Dermatology and Gastroenterology regarding the management of latent tuberculosis and the associated utilization of biologic and targeted synthetic DMARDS (disease modifying antirheumatic drugs)
Source: PubMed Central journal article supplement (PMC9981509; doi:10.1007/s00393-022-01274-6), 2022-11-07
Supplement: 393_2022_1274_MOESM3_ESM.pdf [file 393_2022_1274_MOESM3_ESM.pdf]

Zusätzliche Tabelle 1

| Zielstruktur | Tuberkulose-Screening notwendig-<br>Expertenconsens | Theoretisches<br>Tuberkuloserisiko | Evidenz für<br>Tuberkuloserisiko | Laut Fachinformation Tuberkulose-<br>Screening empfohlen |
|--------------|-----------------------------------------------------|------------------------------------|----------------------------------|----------------------------------------------------------|
| TNF          | 100%                                                | ja                                 | ja (8,9,10,11)                   | ja                                                       |
| IL 6R        | 100%                                                | ja?                                | nein (6,12,13,15)                | ja                                                       |
| JAKs         | 100%                                                | ja?                                | nein (6,23,24,25)                | ja                                                       |
| CD80/86      | 100%                                                | nein?                              | nein (6,13,15)                   | ja                                                       |
| IL 12/23     | 100%                                                | ja?                                | nein (6,12,15)                   | ja                                                       |
| IL 23        | 80%                                                 | ja?                                | nein (21,22)                     | ja                                                       |
| IL 1         | 80%                                                 | nicht klar                         | nein (13,14)                     | ja                                                       |
| IFNAR1       | 100%                                                | nicht klar                         | nein (32,33,34,35)               | nein                                                     |
| Integrin     | 66%                                                 | nein                               | nein (29)                        | ja                                                       |
| IL 17        | 7%                                                  | nein                               | nein (6,15,18,20)                | nein                                                     |
| CD20         | 0%                                                  | nein                               | nein (5,6,7)                     | nein                                                     |
| BlyS         | 0%                                                  | nein                               | nein (17)                        | nein                                                     |
| PDE4         | 0%                                                  | ja?                                | nein (6,18)                      | nein                                                     |
| RANKL        | 0%                                                  | nein                               | nein (26,27)                     | nein                                                     |
| Sklerostin   | 0%                                                  | nein                               | nein (28)                        | nein                                                     |
| IgE          | 0%                                                  | nein                               | nein (12)                        | nein                                                     |
| C5           | 0%                                                  | nein                               | nein (12)                        | nein                                                     |
| IL 5         | 0%                                                  | nein                               | nein (12)                        | nein                                                     |
| IL 4R/13R    | 0%                                                  | nein                               | nein (31)                        | nein                                                     |

Zusammenfassung der Fakten, die zur Expertenentscheidung geführt haben
