# Supplementary material for: National consensus statement by the Austrian Societies for Rheumatology, Pulmonology, Infectiology, Dermatology and Gastroenterology regarding the management of latent tuberculosis and the associated utilization of biologic and targeted synthetic DMARDS (disease modifying antirheumatic drugs)
Source: PubMed Central journal article supplement (PMC9981509; doi:10.1007/s00393-022-01274-6), 2022-11-07
Supplement: 393_2022_1274_MOESM4_ESM.pdf [file 393_2022_1274_MOESM4_ESM.pdf]

Zusätzliche Tabelle 2:

Nebenwirkungen/Kontraindikationen/Interaktionen von INH und Rifampicin

|                           | <b>Isoniazid</b>                                                                                                                                                  | <b>Rifampicin</b>                                                                                                                                                   |
|---------------------------|-------------------------------------------------------------------------------------------------------------------------------------------------------------------|---------------------------------------------------------------------------------------------------------------------------------------------------------------------|
| <b>Nebenwirkungen</b>     | Polyneuritis (in Kombination mit Vitamin B6 Gabe deutlich reduziert), psychische Störungen, Verdauungsstörung, Hepatitis/lebertoxisch, Hautausschlag, Augenrötung | Müdigkeit, Benommenheit, Thrombozytopenie, Flu-like-Syndrom, Magen-Darm-Beschwerden, Hepatitis/lebertoxisch, Hautreaktionen, färbt Körperflüssigkeiten orangerot    |
| <b>Kontraindikationen</b> | Überempfindlichkeit, periphere Neuritis, schwere Blutungsneigung, schwere Lebererkrankung                                                                         | Überempfindlichkeit, schwere Leberfunktionsstörung, Porphyrie, gleichzeitige Anwendung mit Saquinavir/Ritonavir                                                     |
| <b>Interaktionen</b>      | Barbiturate, Phenytoin, Carbamazepin, Primidon, Rifampicin, Valproinsäure, Paracetamol, Ketoconazol, Disulfiram, Alkohol, Antazida, Levodopa                      | CYP450-Induktor – Vielzahl an Interaktionen, insbesondere Antiepileptika, Benzodiazepine, Paracetamol, Azol-Antimykotika, antivirale Therapien, Antiarrhythmika,... |
