# Supplementary material for: Consensus Statement der Österreichischen Gesellschaften für Rheumatologie und Rehabilitation, Pneumologie, Infektiologie, Dermatologie und Gastroenterologie zum Umgang mit latenter Tuberkulose bei Therapien mit biologischen oder „targeted synthetic“ DMARDs („disease modifying antirheumatic drugs“)
Source: Springer Nature journal article supplement (doi:10.1007/s00393-022-01274-6), 2022-11-07
Supplement: MOESM2 [file 23684914]

## Zusätzliche Abbildung 2

### Consensus statements und Angaben der Zustimmung der TeilnehmerInnen in %

#### Wann soll auf latente Tuberkulose gescreent werden?

Vor Beginn einer bDMARD- oder tsDMARD-Therapie, bei der eine präventive Tbc-Therapie notwendig wäre, muss auf latente Tbc untersucht/gescreent werden

(Heat-Map: rot, orange) 100%

| Zielstruktur        | Tb-Risiko   | Screening | Präventive Therapie |
|---------------------|-------------|-----------|---------------------|
| <b>TNF</b>          | hoch        | ja        | ja                  |
| <b>IL 6R</b>        | mittel/hoch | ja        | ja                  |
| <b>JAKs</b>         | hoch        | ja        | ja                  |
| <b>CD80/86</b>      | niedrig     | ja        | ja                  |
| <b>IL 12/23</b>     | niedrig     | ja        | ja                  |
| <b>IL 23</b>        | niedrig     | ja        | ja                  |
| <b>IL 1</b>         | niedrig     | ja        | ja                  |
| <b>IFNRA1</b>       | niedrig     | ja        | ja                  |
| <b>Integrin</b>     | niedrig     | ja        | ja                  |
| <b>IL 17</b>        | niedrig     | nein      | nein                |
| <b>CD20</b>         | nein        | nein      | nein                |
| <b>BLyS</b>         | nein        | nein      | nein                |
| <b>PDE4</b>         | nein        | nein      | nein                |
| <b>RANKL</b>        | nein        | nein      | nein                |
| <b>Sklerostin</b>   | nein        | nein      | nein                |
| <b>IgE</b>          | nein        | nein      | nein                |
| <b>C5, C5aR</b>     | nein        | nein      | nein                |
| <b>IL 5, IL 5R</b>  | nein        | nein      | nein                |
| <b>IL 4R/IL 13R</b> | nein        | nein      | nein                |

## Bei welchen bDMARD/tsDMARDs soll eine Therapie bei latenter Tuberkulose erfolgen?

Bei folgenden Medikamenten ist eine präventive Tuberkulose-Therapie notwendig (Heat-Map: rot, orange):

|                 |      |
|-----------------|------|
| anti-TNF        | 100% |
| anti-IL6R       | 100% |
| JAK-Inhibitoren | 100% |
| Abatacept       | 100% |
| anti-IL12/23    | 100% |
| anti-IL23       | 80%  |
| anti-IL1        | 80%  |
| anti-IFNAR1     | 100% |
| Vedolizumab     | 66%  |

Bei folgenden Medikamenten ist eine präventive Tuberkulose-Therapie NICHT notwendig (Heat-Map: gelb, grün):

|                      |      |
|----------------------|------|
| Anti-IL17            | 86%  |
| anti-CD20            | 100% |
| anti-BLyS            | 100% |
| Apremilas            | 100% |
| RANKL-Inhibitor      | 100% |
| Sklerostin-Inhibitor | 100% |
| Anti-IgE             | 93%  |
| Anti-C5              | 93%  |
| Anti-IL5             | 93%  |
| Anti-IL4             | 93%  |

## Wie soll auf latente Tuberkulose gescreent werden

- Das Screening auf latente Tuberkulose umfasst eine Anamnese, einen IGRA-Test sowie ein Thorax-Röntgen. 100%
- Bei nicht immunsupprimierten Personen sowie geplantem Niedrig-Risiko-Medikament (Heat Map orange) kann auf ein Thorax-Röntgen verzichtet werden. 100%
- IGRA Befunde müssen immer gut dokumentiert werden. 100%
- Ein Tuberkulin Hauttest bleibt Spezialfragestellungen vorbehalten. 100%

## Wie erfolgt die präventive Therapie der latenten Tuberkulose

- Für die präventive Tuberkulose-Therapie stehen folgende Behandlungsschemata zur Auswahl:
  - Rifampicin (RIF) für 4 Monate
  - Isoniazid (INH) für 9 Monate
  - Kombination Rifampicin + INH für 3 Monate 100%
- Co-Morbiditäten, Co-Medikationen, erwartbare Therapieadhärenz des Patienten, sowie Verfügbarkeit der Medikamente sind bei der Auswahl zu berücksichtigen. 100%
- Die präventive Therapie soll gut dokumentiert werden, um zukünftigen Behandlern Klarheit zu verschaffen 100%
- Nach frühestens 4 Wochen präventiver Tuberkulose-Therapie kann bei guter Verträglichkeit die Therapie mit einem bDMARD bzw. tsDMARD begonnen werden. 100%

## Welche Kontrollen sollen während der Präventivtherapie erfolgen?

- Vor präventiver Tuberkulose-Therapie sollen Anamnese, Patientenaufklärung sowie ein Basislabor  
(Blutbild, ALT, AST, GGT, AP, Bilirubin, Kreatinin) erfolgen 100%
- Unter präventiver Tuberkulose-Therapie soll nach 2 Wochen, danach 4-wöchentlich die Bestimmung von Blutbild,  
ALT, AST, AP, GGT, Bilirubin und Kreatinin erfolgen. 100%
- Bei vorbestehender Lebererkrankung  
erfolgen individuelle Kontrollintervalle 100%
- Besondere Vorsicht ist bei der Kombination mit anderen potentiell hepatotoxischen  
Medikamenten geboten (Methotrexat, Leflunomid, Salazopyrin). 93%
- Bei Transaminasenanstieg >3fachen oberen Normwert sollen wöchentliche Kontrollen,  
bei >5fachen Normwert soll ein Therapieabbruch erfolgen. 100%

## Was macht man bei Unverträglichkeit der Präventivtherapie?

- Bei Unverträglichkeit eines Tuberkulose-Medikamentes  
soll das andere verfügbare Medikament versucht werden. 100%
- Bei Unverträglichkeit beider Tuberkulose-Medikamente soll die Umstellung der rheumatologischen Basistherapie  
auf ein Niedrig-Risiko-Medikament erfolgen (Heat-Map: grün, gelb). 100%
- Die Nicht-Therapie der latenten Tuberkulose bei einer Basistherapie mit einem Medikament aus dem orange/roten Bereich der Heat-Map erfordert einen mündlichen und schriftlich dokumentierten Consensus über die Nutzen/Risikoabwägung  
mit dem Patienten/der Patientin sowie engmaschige Kontrollen. 93%

### Wie ist das Vorgehen nach einer abgeschlossenen Tuberkulose-Therapie?

- Nach einer vollständig durchgeführten Therapie einer Tuberkulose oder einer latenten Tuberkulose muss im Verlauf (auch bei positivem IGRA Befund) keine weitere Tuberkulose-Therapie mehr durchgeführt werden  
(außer bei neuerlicher nachgewiesener Infektion). 100%

### Was macht man bei inkonklusivem IGRA?

- Bei wiederholt inkonklusivem IGRA soll ein anderer Test  
(anderer IGRA, Tuberkulose-Hauttest) durchgeführt werden. 100%
- Bei weiterhin inkonklusivem Test-Ergebnis kann – bei fehlendem Hinweis auf Tuberkulose im CT-Thorax – die bDMARD bzw. tsDMARD-Therapie ohne präventive Tuberkulose-Therapie gestartet werden. 86%

### Wann ist die Wiederholung des IGRA notwendig?

- Die Wiederholung eines vormals negativem IGRA unter laufender bDMARD/tsDMARD-Therapie oder bei Wechsel der bDMARD/tsDMARD-Therapie ist nur bei klinischem Verdacht (z.B. Kontakt mit Tuberkulose, Reise in ein Endemiegebiet) notwendig. 93%
